# Supplementary material for: Synthesis, crystal structure, and insulin-mimetic activity of zinc(ii) complexes with 4-alkyl- and 4,5-dialkyl-3-hydroxythiazole-2(3H)-thiones as a new class of hypoglycemic agent candidates
Source: Royal Society of Chemistry journal article supplement (doi:10.1039/d4nj04035j), 2024-11-12
Supplement: d4nj04035j1.pdf [file d4nj04035j1.pdf]

## Supplementary Information

### Synthesis, crystal structure, and insulin-mimetic activity of zinc(II) complexes with 4-alkyl- and 4,5-dialkyl-3-hydroxythiazole-2(3*H*)-thiones as a new class of hypoglycemic agent candidates

Ryota Saito\*<sup>1,2</sup> Yuki Naito,<sup>3</sup> Yutaka Yoshikawa,<sup>4</sup> Hiroyuki Yasui,<sup>3</sup> Shoko Kikkawa,<sup>5</sup> Huieyong Ju,<sup>6</sup> Rintaro Ohba,<sup>1</sup> Tae Miyamoto,<sup>1</sup> Shogo Sano,<sup>1</sup> Kazuya Maeda,<sup>1</sup> Mako Tamura,<sup>1</sup> and Isao Azumaya<sup>5</sup>

<sup>1</sup>Department of Chemistry, Toho University, 2-2-1 Miyama, Funabashi, Chiba, 274-8510 Japan.

<sup>2</sup>Research Center for Materials with Integrated Properties, Toho University, 2-2-1 Miyama, Funabashi, Chiba 274-8510, Japan.

<sup>3</sup>Department of Analytical and Bioinorganic Chemistry, Kyoto Pharmaceutical University, Kyoto 607-8414, Japan.

<sup>4</sup>Department of Health, Sports and Nutrition, Kobe Women's University, 4-7-2 Minatojima-nakamachi, Chuo-ku, Kobe 650-0046, Japan.

<sup>5</sup>Faculty of Pharmaceutical Sciences, Toho University, 2-2-1 Miyama, Funabashi, Chiba, 274-8510 Japan.

<sup>6</sup>Western Seoul Center, Korea Basic Science Institute, 150 Bugahyeon-ro, Seodaemun-gu, Seoul 03759, South Korea

### Contents

**Table S1.** Crystallographic data and refinement statistics for Zn(**4**)<sub>2</sub>, Zn(**5f**)<sub>2</sub>, Zn(**5h**)<sub>2</sub>, Zn(**6**)<sub>2</sub>, and Zn(**5h**)<sub>2</sub> with pyridine p.2–4

**Fig. S1.** Plots of the relative pIC<sub>50</sub> values (in Table 3) of the zinc(II) complexes, Zn(**1a–e**)<sub>2</sub>, Zn(**2a**)<sub>2</sub>, Zn(**2f**)<sub>2</sub>, Zn(**4**)<sub>2</sub>, Zn(**5f**)<sub>2</sub>, Zn(**5h**)<sub>2</sub>, and Zn(**6**)<sub>2</sub>, against (A) the Verloop's sterimol length, *L*, (B) the V sterimol minimum width, *B*<sub>1</sub>, and (C) the sterimol maximum width, *B*<sub>5</sub>. p.5

**Fig. S2.** Calibration curve generating by plotting log*P* against log*k'* obtained by the RP-HPLC for a series of standards (phenol, benzene, bromobenzene, naphthalene, biphenyl, and phenanthrene). p.5

**Table S1.** Crystallographic data and refinement statistics for Zn(**4**)<sub>2</sub>, Zn(**5f**)<sub>2</sub>, Zn(**5h**)<sub>2</sub>, Zn(**6**)<sub>2</sub>, and Zn(**5h**)<sub>2</sub> with pyridine

| Complex                                            |               | Zn( <b>4</b> ) <sub>2</sub>                                                     | Zn( <b>5f</b> ) <sub>2</sub>                                                    |
|----------------------------------------------------|---------------|---------------------------------------------------------------------------------|---------------------------------------------------------------------------------|
| Formula                                            |               | C <sub>10</sub> H <sub>12</sub> N <sub>2</sub> O <sub>2</sub> S <sub>6</sub> Zn | C <sub>10</sub> H <sub>12</sub> N <sub>2</sub> O <sub>2</sub> S <sub>4</sub> Zn |
| Formula weight                                     |               | 441.93                                                                          | 385.83                                                                          |
| Temperature /K                                     |               | 120                                                                             | 120                                                                             |
| Wavelength /Å                                      |               | 0.71073                                                                         | 0.71073                                                                         |
| Crystal system                                     |               | Monoclinic                                                                      | Monoclinic                                                                      |
| Space group                                        |               | <i>P2<sub>1</sub>/n</i>                                                         | <i>P2<sub>1</sub>/c</i>                                                         |
| Unit cell dimensions                               | <i>a</i> /Å   | 8.6523(3)                                                                       | 11.6997(5)                                                                      |
|                                                    | <i>b</i> /Å   | 21.5296(8)                                                                      | 7.5824(3)                                                                       |
|                                                    | <i>c</i> /Å   | 10.1015(4)                                                                      | 17.5946(7)                                                                      |
|                                                    | $\alpha$ /deg | 90                                                                              | 90                                                                              |
|                                                    | $\beta$ /deg  | 103.2029(6)                                                                     | 108.7288(6)                                                                     |
|                                                    | $\gamma$ /deg | 90                                                                              | 90                                                                              |
| Volume /Å <sup>3</sup>                             |               | 1831.97(12)                                                                     | 1432.83(10)                                                                     |
| <i>Z</i>                                           |               | 4                                                                               | 4                                                                               |
| Density (calculated)                               |               | 1.602 Mg/m <sup>3</sup>                                                         | 1.789 Mg/m <sup>3</sup>                                                         |
| Absorption coefficient                             |               | 1.805 mm <sup>-1</sup>                                                          | 2.293 mm <sup>-1</sup>                                                          |
| <i>F</i> (000)                                     |               | 912                                                                             | 784                                                                             |
| Crystal size                                       |               | 0.354x0.241x0.203 mm <sup>3</sup>                                               | 0.403x0.263x0.203 mm <sup>3</sup>                                               |
| Theta range for data collection                    |               | 2.596 to 25.998°                                                                | 2.522 to 25.999°                                                                |
| Index ranges                                       |               | -10<= <i>h</i> <=9, -26<= <i>k</i> <=17,<br>-12<= <i>l</i> <=12                 | -14<= <i>h</i> <=14, -9<= <i>k</i> <=9,<br>-10<= <i>l</i> <=21                  |
| Reflections collected                              |               | 10590                                                                           | 7993                                                                            |
| Independent reflections                            |               | 3608 [ <i>R</i> (int) = 0.0229]                                                 | 2810 [ <i>R</i> (int) = 0.0176]                                                 |
| Completeness to theta = 25.242°                    |               | 99.9%                                                                           | 99.7%                                                                           |
| Absorption correction                              |               | Semi-empirical from<br>equivalents                                              | Semi-empirical from equivalents                                                 |
| Max. and min. transmission                         |               | 0.7457 and 0.6775                                                               | 0.7457 and 0.6564                                                               |
| Refinement method                                  |               | Full-matrix least-squares on <i>F</i> <sup>2</sup>                              | Full-matrix least-squares on <i>F</i> <sup>2</sup>                              |
| Data / restraints / parameters                     |               | 3608 / 0 / 208                                                                  | 2810 / 0 / 172                                                                  |
| Goodness-of-fit on <i>F</i> <sup>2</sup>           |               | 1.030                                                                           | 1.045                                                                           |
| Final <i>R</i> indices [ <i>I</i> >2σ( <i>I</i> )] |               | <i>R</i> <sub>1</sub> = 0.0223, <i>wR</i> <sub>2</sub> = 0.0553                 | <i>R</i> <sub>1</sub> = 0.0299, <i>wR</i> <sub>2</sub> = 0.0855                 |
| <i>R</i> indices (all data)                        |               | <i>R</i> <sub>1</sub> = 0.0249, <i>wR</i> <sub>2</sub> = 0.0570                 | <i>R</i> <sub>1</sub> = 0.0312, <i>wR</i> <sub>2</sub> = 0.0865                 |
| Extinction coefficient                             |               | n/a                                                                             | n/a                                                                             |
| Largest diff. peak and hole                        |               | 0.308 and -0.370 e.Å <sup>-3</sup>                                              | 0.756 and -0.747 e.Å <sup>-3</sup>                                              |

**Table S1.** (continued)

| Complex                                            |                        | Zn( <b>5h</b> ) <sub>2</sub>                                                    | Zn( <b>6</b> ) <sub>2</sub>                                                     |
|----------------------------------------------------|------------------------|---------------------------------------------------------------------------------|---------------------------------------------------------------------------------|
| Formula                                            |                        | C <sub>12</sub> H <sub>16</sub> N <sub>2</sub> O <sub>2</sub> S <sub>4</sub> Zn | C <sub>14</sub> H <sub>16</sub> N <sub>2</sub> O <sub>2</sub> S <sub>4</sub> Zn |
| Formula weight                                     |                        | 413.88                                                                          | 437.90                                                                          |
| Temperature /K                                     |                        | 120                                                                             | 120                                                                             |
| Wavelength /Å                                      |                        | 0.71073                                                                         | 0.71073                                                                         |
| Crystal system                                     |                        | Triclinic                                                                       | Monoclinic                                                                      |
| Space group                                        |                        | <i>P</i> -1                                                                     | <i>C</i> 2/ <i>c</i>                                                            |
| Unit cell dimensions                               | <i>a</i> /Å            | 7.5733(16)                                                                      | 11.9955(7)                                                                      |
|                                                    | <i>b</i> /Å            | 8.7066(19)                                                                      | 10.9525(7)                                                                      |
|                                                    | <i>c</i> /Å            | 13.442(3)                                                                       | 12.7788(8)                                                                      |
|                                                    | $\alpha$ /deg          | 78.741(2)                                                                       | 90                                                                              |
|                                                    | $\beta$ /deg           | 74.963(2)                                                                       | 94.2060(10)                                                                     |
|                                                    | $\gamma$ /deg          | 88.673(3)                                                                       | 90                                                                              |
|                                                    | Volume /Å <sup>3</sup> | 839.1(3)                                                                        | 1674.37(18)                                                                     |
| <i>Z</i>                                           |                        | 2                                                                               | 4                                                                               |
| Density (calculated)                               |                        | 1.638 Mg/m <sup>3</sup>                                                         | 1.737 Mg/m <sup>3</sup>                                                         |
| Absorption coefficient                             |                        | 1.964 mm <sup>-1</sup>                                                          | 1.974 mm <sup>-1</sup>                                                          |
| <i>F</i> (000)                                     |                        | 424                                                                             | 896                                                                             |
| Crystal size                                       |                        | 0.209x0.145x0.109 mm <sup>3</sup>                                               | 0.292x0.179x0.050 mm <sup>3</sup>                                               |
| Theta range for data collection                    |                        | 1.60 to 26.00°                                                                  | 2.521 to 25.994°                                                                |
| Index ranges                                       |                        | -9<= <i>h</i> <=9, -10<= <i>k</i> <=10,<br>-16<= <i>l</i> <=16                  | -9<= <i>h</i> <=14, -13<= <i>k</i> <=13,<br>-13<= <i>l</i> <=15                 |
| Reflections collected                              |                        | 8842                                                                            | 4733                                                                            |
| Independent reflections                            |                        | 3303 [ <i>R</i> (int) = 0.0413]                                                 | 1642 [ <i>R</i> (int) = 0.0281]                                                 |
| Completeness to theta = 25.242°                    |                        | 100.0%                                                                          | 99.9%                                                                           |
| Absorption correction                              |                        | Semi-empirical from equivalents                                                 | Semi-empirical from equivalents                                                 |
| Max. and min. transmission                         |                        | 0.7457 and 0.6376                                                               | 0.7457 and 0.6427                                                               |
| Refinement method                                  |                        | Full-matrix least-squares on <i>F</i> <sup>2</sup>                              | Full-matrix least-squares on <i>F</i> <sup>2</sup>                              |
| Data / restraints / parameters                     |                        | 3303 / 0 / 190                                                                  | 1642 / 0 / 105                                                                  |
| Goodness-of-fit on <i>F</i> <sup>2</sup>           |                        | 1.006                                                                           | 1.033                                                                           |
| Final <i>R</i> indices [ <i>I</i> >2σ( <i>I</i> )] |                        | <i>R</i> <sub>1</sub> = 0.0376, <i>wR</i> <sub>2</sub> = 0.0844                 | <i>R</i> <sub>1</sub> = 0.0232, <i>wR</i> <sub>2</sub> = 0.0568                 |
| <i>R</i> indices (all data)                        |                        | <i>R</i> <sub>1</sub> = 0.0609, <i>wR</i> <sub>2</sub> = 0.0963                 | <i>R</i> <sub>1</sub> = 0.0262, <i>wR</i> <sub>2</sub> = 0.0600                 |
| Extinction coefficient                             |                        | n/a                                                                             | n/a                                                                             |
| Largest diff. peak and hole                        |                        | 0.562 and -0.496 e.Å <sup>-3</sup>                                              | 0.320 and -0.218 e.Å <sup>-3</sup>                                              |

**Table S1.** (continued)

| Complex                                             |               | Zn( <b>3</b> ) <sub>2</sub> (with pyridine)                                                     | Zn( <b>5f</b> ) <sub>2</sub> (with pyridine)                                    |
|-----------------------------------------------------|---------------|-------------------------------------------------------------------------------------------------|---------------------------------------------------------------------------------|
| Formula                                             |               | C <sub>25</sub> H <sub>19</sub> Cl <sub>2</sub> N <sub>3</sub> O <sub>2</sub> S <sub>4</sub> Zn | C <sub>15</sub> H <sub>17</sub> N <sub>3</sub> O <sub>2</sub> S <sub>4</sub> Zn |
| Formula weight                                      |               | 657.97                                                                                          | 464.93                                                                          |
| Temperature /K                                      |               | 93                                                                                              | 120                                                                             |
| Wavelength /Å                                       |               | 0.71073                                                                                         | 0.71073                                                                         |
| Crystal system                                      |               | Monoclinic                                                                                      | Monoclinic                                                                      |
| Space group                                         |               | <i>P2<sub>1</sub>/c</i>                                                                         | <i>P2<sub>1</sub></i>                                                           |
| Unit cell dimensions                                | <i>a</i> /Å   | 13.8856(3)                                                                                      | 8.3806(3)                                                                       |
|                                                     | <i>b</i> /Å   | 15.5863(4)                                                                                      | 13.3652(4)                                                                      |
|                                                     | <i>c</i> /Å   | 12.3909(3)                                                                                      | 9.0229(3)                                                                       |
|                                                     | $\alpha$ /deg | 90                                                                                              | 90                                                                              |
|                                                     | $\beta$ /deg  | 92.948(2)                                                                                       | 103.7934(4)                                                                     |
|                                                     | $\gamma$ /deg | 90                                                                                              | 90                                                                              |
| Volume /Å <sup>3</sup>                              |               | 2678.15(11)                                                                                     | 981.50(6)                                                                       |
| <i>Z</i>                                            |               | 4                                                                                               | 2                                                                               |
| Density (calculated)                                |               | 1.632 Mg/m <sup>3</sup>                                                                         | 1.573 Mg/m <sup>3</sup>                                                         |
| Absorption coefficient                              |               | 1.459 mm <sup>-1</sup>                                                                          | 1.690 mm <sup>-1</sup>                                                          |
| <i>F</i> (000)                                      |               | 1336                                                                                            | 476                                                                             |
| Crystal size                                        |               | 0.111x0.091x0.053 mm <sup>3</sup>                                                               | 0.40x0.22x0.18 mm <sup>3</sup>                                                  |
| Theta range for data collection                     |               | 2.612 to 27.499                                                                                 | 2.32 to 27.90°                                                                  |
| Index ranges                                        |               | -17 ≤ <i>h</i> ≤ 17, -20 ≤ <i>k</i> ≤ 20,<br>-16 ≤ <i>l</i> ≤ 13                                | -7 ≤ <i>h</i> ≤ 11, -17 ≤ <i>k</i> ≤ 17,<br>-11 ≤ <i>l</i> ≤ 9                  |
| Reflections collected                               |               | 41661                                                                                           | 25560                                                                           |
| Independent reflections                             |               | 6106 [ <i>R</i> (int) = 0.0486]                                                                 | 4202 [ <i>R</i> (int) = 0.0103]                                                 |
| Completeness to theta = 25.242°                     |               | 99.9%                                                                                           | 99.70%                                                                          |
| Absorption correction                               |               | multi-scan                                                                                      | Empirical                                                                       |
| Max. and min. transmission                          |               | 0.926 and 0.655                                                                                 | 0.7518 and 0.5505                                                               |
| Refinement method                                   |               | Full-matrix least-squares on <i>F</i> <sup>2</sup>                                              | Full-matrix least-squares on <i>F</i> <sup>2</sup>                              |
| Data / restraints / parameters                      |               | 6106 / 0 / 336                                                                                  | 4202 / 1 / 230                                                                  |
| Goodness-of-fit on <i>F</i> <sup>2</sup>            |               | 1.027                                                                                           | 1.064                                                                           |
| Final <i>R</i> indices [ <i>I</i> > 2σ( <i>I</i> )] |               | <i>R</i> <sub>1</sub> = 0.0317 and <i>wR</i> <sub>2</sub> = 0.0662                              | <i>R</i> <sub>1</sub> = 0.0168, <i>wR</i> <sub>2</sub> = 0.0444                 |
| <i>R</i> indices (all data)                         |               | <i>R</i> <sub>1</sub> = 0.0442 and <i>wR</i> <sub>2</sub> = 0.0696                              | <i>R</i> <sub>1</sub> = 0.0169, <i>wR</i> <sub>2</sub> = 0.0445                 |
| Extinction coefficient                              |               | n/a                                                                                             | n/a                                                                             |
| Largest diff. peak and hole                         |               | 0.46 and -0.40 eÅ <sup>-3</sup>                                                                 | 0.217 and -0.249 eÅ <sup>-3</sup>                                               |

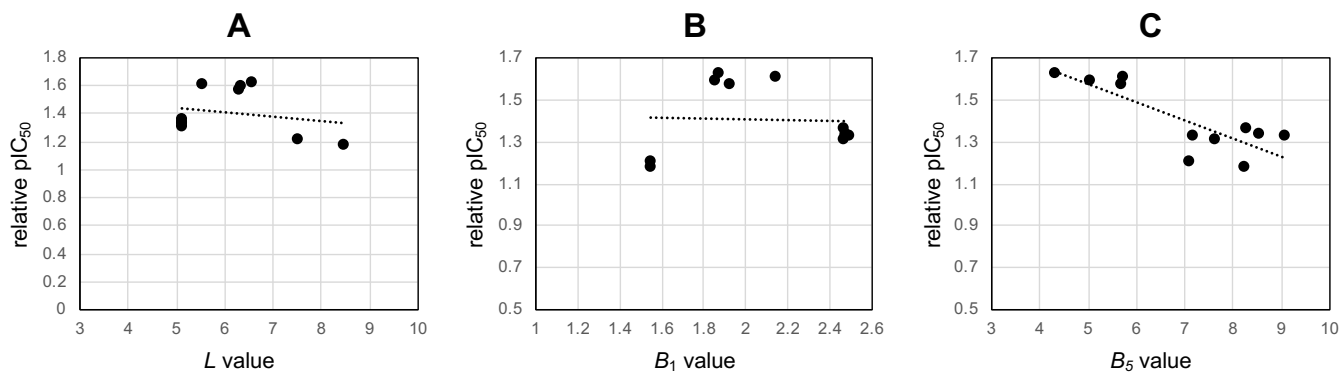

**Fig. S1.** Plots of the relative pIC<sub>50</sub> values (in Table 3) of the zinc(II) complexes, Zn(1a–e)<sub>2</sub>, Zn(2a)<sub>2</sub>, Zn(2f)<sub>2</sub>, Zn(4)<sub>2</sub>, Zn(5f)<sub>2</sub>, Zn(5h)<sub>2</sub>, and Zn(6)<sub>2</sub>, against (A) the Verloop's sterimol length, *L*, (B) the V sterimol minimum width, *B*<sub>1</sub>, and (C) the sterimol maximum width, *B*<sub>5</sub>.

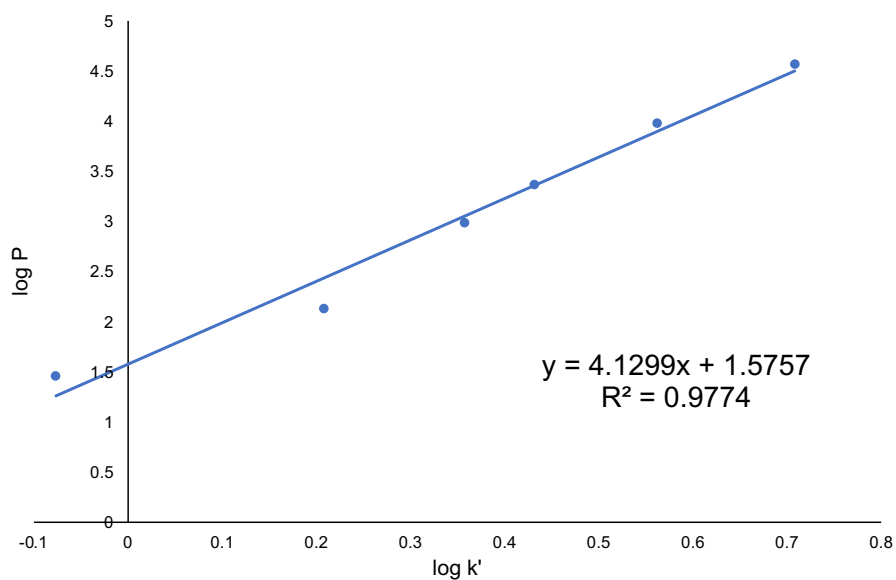

**Fig. S2.** Calibration curve generating by plotting log*P* against log*k'* obtained by the RP-HPLC for a series of standards (phenol, benzene, bromobenzene, naphthalene, biphenyl, and phenanthrene).
